# Supplementary material for: Investigation of local structure distortion and electron cloud interaction on emission-band broadening induced by the concentration perturbation effect of cation substitution in BaY2Si3O10:Eu phosphors
Source: Royal Society of Chemistry journal article supplement (doi:10.1039/c9ce00778d), 2019-01-01
Supplement: c9ce00778d1.pdf [file c9ce00778d1.pdf]

**Electronic Supplementary Information**

**Investigation of local structure distortion and electron cloud interaction on  
emission-band broadening induced by concentration-perturbation effect of cation  
substituting in BaY<sub>2</sub>Si<sub>3</sub>O<sub>10</sub>:Eu phosphors**

Haoran Li<sup>a</sup>, Yujun Liang<sup>a,\*</sup>, Yingli Zhu<sup>a</sup>, Shiqi Liu<sup>a</sup>, Jiahui Chen<sup>a</sup>, Hang Zhang<sup>a</sup>, Yongjun Chen<sup>b</sup>

<sup>a</sup>Engineering Research Center of Nano-Geomaterials of Ministry of Education, Faculty of Materials  
Science and Chemistry, China University of Geosciences, Wuhan 430074, China, *E-mail:*

[yujunliang@sohu.com](mailto:yujunliang@sohu.com)

<sup>b</sup>State Key Laboratory of Marine Resource Utilization in South China Sea, School of Materials Science  
and Engineering, Hainan University, Haikou 570228, China

\*Corresponding Author: [yujunliang@sohu.com](mailto:yujunliang@sohu.com)(Y. Liang).

Table S1 The cell parameters and reliability factors for BYSO:Eu, (x/y/z)M<sup>2+</sup> (M = Mn, x = 0.0%-6.0%; M = Mg, y = 0.0%-5.0%, M = Zn, z = 0.0%-20.0%, respectively)

| Mn     | a (Å)       | b (Å)        | c (Å)       | V (Å <sup>3</sup> ) | R <sub>p</sub> | R <sub>wp</sub> | R <sub>exp</sub> | χ <sup>2</sup> |
|--------|-------------|--------------|-------------|---------------------|----------------|-----------------|------------------|----------------|
| 0.0%   | 5.38941(13) | 12.18531(30) | 6.84419(15) | 431.186(18)         | 5.47           | 7.22            | 3.07             | 5.55           |
| 0.2%   | 5.39255(15) | 12.19283(36) | 6.85010(18) | 432.120(21)         | 5.47           | 7.48            | 3.12             | 5.76           |
| 0.4%   | 5.39377(15) | 12.19208(37) | 6.85052(19) | 432.221( 22)        | 5.53           | 7.38            | 3.16             | 5.46           |
| 0.6%   | 5.39324(15) | 12.19249(37) | 6.85053(19) | 432.193( 22)        | 5.71           | 7.76            | 3.08             | 6.37           |
| 0.8%   | 5.3935(16)  | 12.19189(39) | 6.85011(20) | 432.168( 23)        | 5.28           | 7.15            | 3.08             | 5.38           |
| 1.0%   | 5.3938(16)  | 12.19197(37) | 6.85051(19) | 432.221(22)         | 5.62           | 7.54            | 3.08             | 6.00           |
| 2.0%   | 5.39375(16) | 12.19087(39) | 6.85023(20) | 432.164( 23)        | 5.24           | 7.03            | 3.10             | 5.13           |
| 3.0%   | 5.39251(14) | 12.19145(38) | 6.84958(18) | 432.037( 20)        | 5.05           | 6.84            | 3.02             | 5.13           |
| 4.0%   | 5.39273(14) | 12.19597(36) | 6.85027(19) | 432.257( 22)        | 5.2            | 7.16            | 3.08             | 5.40           |
| 5.0%   | 5.39406(15) | 12.19833(35) | 6.85200(18) | 432.549(21)         | 4.92           | 6.75            | 3.10             | 4.74           |
| 6.0%   | 5.39291(14) | 12.1916(33)  | 6.84949(17) | 432.069( 19)        | 5.01           | 6.79            | 2.89             | 5.51           |
| Mg     | a (Å)       | b (Å)        | c (Å)       | V (Å <sup>3</sup> ) | R <sub>p</sub> | R <sub>wp</sub> | R <sub>exp</sub> | χ <sup>2</sup> |
| 0.5%   | 5.39226(14) | 12.1917(34)  | 6.84929(18) | 432.007( 20)        | 4.56           | 6.28            | 3.02             | 4.33           |
| 1.0%   | 5.39232(17) | 12.19132(43) | 6.84893(22) | 431.977(25)         | 5.12           | 7.16            | 2.97             | 5.80           |
| 1.5%   | 5.3926(16)  | 12.1887(38)  | 6.84879(20) | 431.905(22)         | 4.79           | 6.71            | 2.93             | 5.25           |
| 2.0%   | 5.39152(19) | 12.18876(48) | 6.84812(25) | 431.776(28)         | 5.23           | 7.82            | 2.99             | 6.84           |
| 3.0%   | 5.3921(15)  | 12.19274(37) | 6.84914(19) | 432.027(22)         | 4.54           | 6.44            | 3.00             | 4.59           |
| 4.0%   | 5.39177(18) | 12.19024(34) | 6.84849(23) | 431.865(25)         | 5.04           | 7.48            | 3.02             | 6.15           |
| 5.0%   | 5.39336(14) | 12.19651(34) | 6.85102(18) | 432.370(20)         | 4.42           | 6.10            | 3.02             | 4.08           |
| Zn     | a (Å)       | b (Å)        | c (Å)       | V (Å <sup>3</sup> ) | R <sub>p</sub> | R <sub>wp</sub> | R <sub>exp</sub> | χ <sup>2</sup> |
| 1.00%  | 5.3941(15)  | 12.19037(36) | 6.85035(18) | 432.182(21)         | 5.03           | 6.99            | 2.93             | 5.71           |
| 3.00%  | 5.39339(13) | 12.18676(32) | 6.8493(17)  | 431.929(19)         | 4.92           | 6.88            | 2.93             | 5.51           |
| 5.00%  | 5.39327(14) | 12.18908(34) | 6.84956(18) | 432.020(20)         | 4.78           | 6.72            | 2.90             | 5.37           |
| 7.00%  | 5.39302(16) | 12.18977(39) | 6.84955(20) | 432.017(23)         | 5.26           | 7.36            | 2.94             | 6.28           |
| 10.00% | 5.39385(14) | 12.18859(33) | 6.84989(17) | 432.070(19)         | 5.18           | 7.17            | 2.98             | 5.77           |
| 15.00% | 5.39371(15) | 12.18862(37) | 6.84994(19) | 432.062(22)         | 5.06           | 7.45            | 2.94             | 6.43           |
| 20.00% | 5.39246(18) | 12.18933(45) | 6.84882(23) | 431.925(26)         | 5.18           | 7.69            | 2.86             | 7.21           |

Table S2 The distortion index, D, bond length and average U<sub>iso,i</sub> values for BYSO:Eu, xMn (x = 0.0%-6.0%)

| Concentration (mol) |                                     | 0.0%    | 0.2%   | 0.4%   | 0.6%   | 0.8%   | 1.0%   | 2.0%   | 3.0%   | 4.0%   | 5.0%   | 6.0%   |
|---------------------|-------------------------------------|---------|--------|--------|--------|--------|--------|--------|--------|--------|--------|--------|
| D                   | [BaO <sub>8</sub> ]                 | 0.0377  | 0.0380 | 0.0552 | 0.0534 | 0.0549 | 0.0517 | 0.0609 | 0.0471 | 0.0459 | 0.0394 | 0.0398 |
|                     | [YO <sub>6</sub> ]                  | 0.0200  | 0.0196 | 0.0164 | 0.0174 | 0.0123 | 0.0176 | 0.0234 | 0.0141 | 0.0161 | 0.0172 | 0.0156 |
| Bond length         | Ba-O                                | 2.8696  | 2.8720 | 2.8505 | 2.8454 | 2.8077 | 2.8521 | 2.8240 | 2.8368 | 2.8449 | 2.8575 | 2.8713 |
|                     | Y-O                                 | 2.2664  | 2.2682 | 2.2887 | 2.2803 | 2.2582 | 2.2726 | 2.2866 | 2.2748 | 2.2694 | 2.2734 | 2.2736 |
| Average             | [BaO <sub>8</sub> ]                 | 0.50004 | 0.601  | 0.315  | 0.547  | 0.691  | 0.539  | 0.352  | 0.420  | 0.116  | 0.325  | 0.792  |
|                     | U <sub>iso</sub> [YO <sub>6</sub> ] | 0.50006 | 0.824  | 0.921  | 1.134  | 1.072  | 1.262  | 1.375  | 0.731  | 0.810  | 0.395  | 1.323  |

Table S3 The distortion index, D, bond length and average  $U_{iso,i}$  values for BYSO:Eu, yMg ( $y = 0.0\%-5.0\%$ )

| Concentration (mol)          | 0.0%                | 0.5%   | 1.0%   | 1.5%   | 2.0%   | 3.0%   | 4.0%   | 5.0%   |        |
|------------------------------|---------------------|--------|--------|--------|--------|--------|--------|--------|--------|
| D                            | [BaO <sub>8</sub> ] | 0.0377 | 0.0464 | 0.0565 | 0.0437 | 0.0606 | 0.0434 | 0.0538 | 0.0409 |
|                              | [YO <sub>6</sub> ]  | 0.0200 | 0.0125 | 0.0343 | 0.0260 | 0.0319 | 0.0232 | 0.0235 | 0.0188 |
| Bond length                  | Ba-O                | 2.8696 | 2.8641 | 2.8653 | 2.8914 | 2.8885 | 2.8824 | 2.8820 | 2.8701 |
|                              | Y-O                 | 2.2664 | 2.2800 | 2.2702 | 2.2495 | 2.2621 | 2.2673 | 2.2591 | 2.2807 |
| Average [BaO <sub>8</sub> ]  | 0.50004             | 0.613  | 1.451  | 1.212  | 0.917  | 0.773  | 0.715  | 0.648  |        |
| $U_{iso}$ [YO <sub>6</sub> ] | 0.50006             | 1.860  | 1.393  | 1.842  | 1.979  | 1.640  | 1.610  | 1.902  |        |

Table S4 The distortion index, D, bond length and average  $U_{iso,i}$  values for BYSO:Eu, zZn ( $z = 0.0\%-20.0\%$ )

| Concentration (mol)          | 0.0%                | 1.0%   | 3.0%   | 5.0%   | 7.0%   | 10.0%  | 15.0%  | 20.0%  |        |
|------------------------------|---------------------|--------|--------|--------|--------|--------|--------|--------|--------|
| D                            | [BaO <sub>8</sub> ] | 0.0377 | 0.0510 | 0.0403 | 0.0426 | 0.0530 | 0.0448 | 0.0413 | 0.0508 |
|                              | [YO <sub>6</sub> ]  | 0.0200 | 0.0228 | 0.0241 | 0.0193 | 0.0259 | 0.0250 | 0.0204 | 0.0237 |
| Bond length                  | Ba-O                | 2.8696 | 2.8704 | 2.8656 | 2.8547 | 2.8880 | 2.8756 | 2.8656 | 2.8827 |
|                              | Y-O                 | 2.2664 | 2.2791 | 2.2598 | 2.2673 | 2.2582 | 2.2677 | 2.2717 | 2.2599 |
| Average [BaO <sub>8</sub> ]  | 0.50004             | 0.966  | 1.100  | 0.951  | 1.846  | 0.903  | 0.958  | 1.223  |        |
| $U_{iso}$ [YO <sub>6</sub> ] | 0.50006             | 1.895  | 1.697  | 1.952  | 1.806  | 1.575  | 1.954  | 1.528  |        |

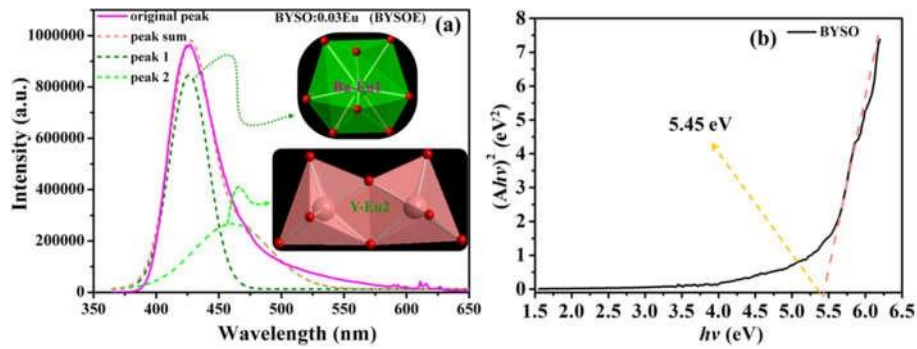

Figure S1. The Gaussian peaks fitting of BYSO:Eu at Ba-Eu(1) site (peaking at 429 nm) and Y-Eu(2) site (peaking at 475 nm) under  $\lambda_{ex} = 323$  nm (a); the plots of  $(Ah\nu)^2$  versus  $h\nu$  of BYSO host (b).

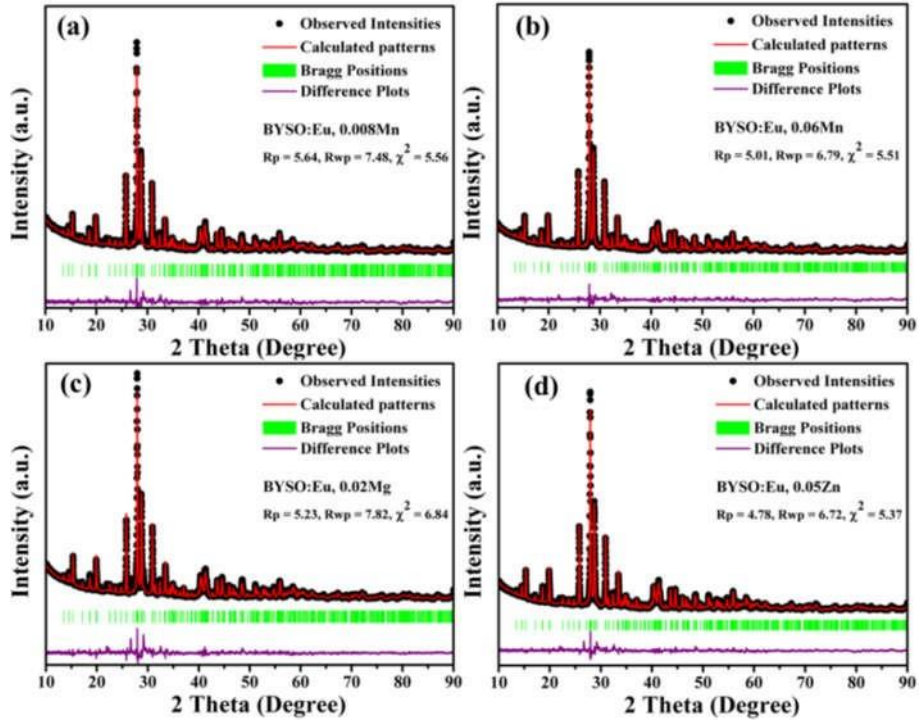

Figure S2. Rietveld refinements results for representative BYSO:Eu, 0.008Mn (a), BYSO:Eu, 0.06Mn (b), BYSO:Eu, 0.02Mg (c) and BYSO:Eu, 0.05Zn (d) using FullProf. program.

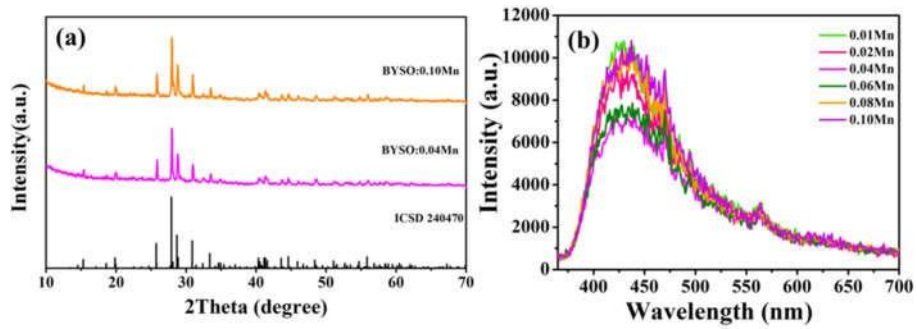

Figure S3. XRD patterns of BYSO:  $m$ Mn,  $m = 0.00-0.10$  and the standard reference for BYSO (ICSD 240470) (a), PL spectra of BYSO:  $m$ Mn,  $m = 0.00-0.10$ .

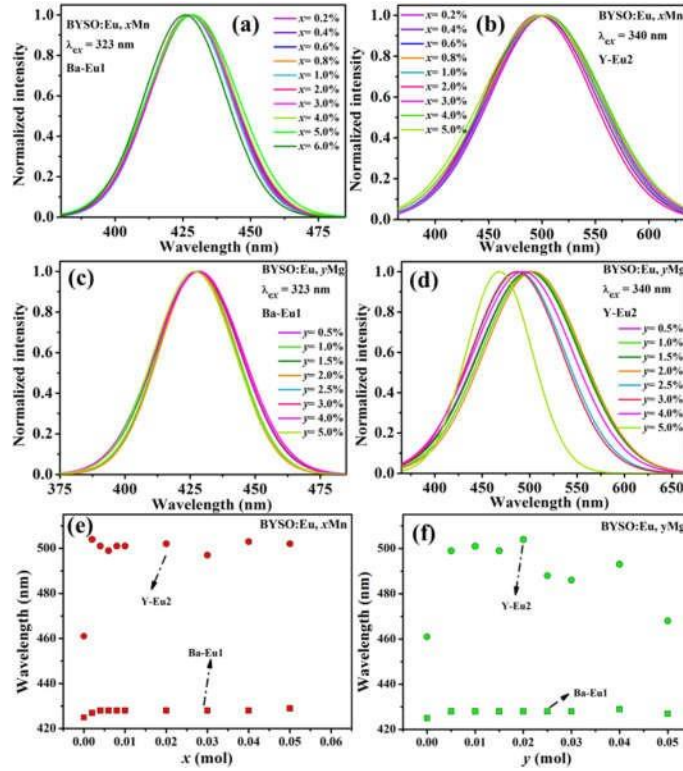

Figure S4. The PL spectra are decomposed into Gaussian contributions from  $\text{Eu}^{2+}$  at the two cation sites in the  $\text{BYSO:Eu}, (x/y)\text{M}^{2+}$ :  $\text{M} = \text{Mn}$ ,  $x = 0.2\% - 6.0\%$ ,  $\text{Eu}^{2+}$  at the  $\text{Ba}^{2+}$  sites (a),  $\text{Eu}^{2+}$  at the  $\text{Y}^{3+}$  sites (b);  $\text{M} = \text{Mg}$ ,  $y = 0.5\% - 5.0\%$ ,  $\text{Eu}^{2+}$  at the  $\text{Ba}^{2+}$  sites (c),  $\text{Eu}^{2+}$  at the  $\text{Y}^{3+}$  sites (d); emission peak shifts of  $\text{Eu1}$  and  $\text{Eu2}$  for  $\text{BYSO:Eu}, x\text{Mn}^{2+}$  (e) and  $\text{BYSO:Eu}, y\text{Mg}^{2+}$  (f).

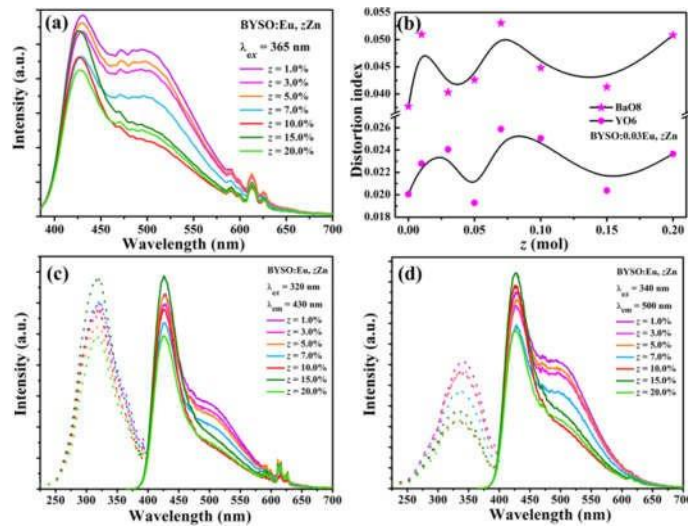

Figure S5. PL spectra of  $\text{BYSO:Eu}, z\text{Zn}$  samples excited at  $\lambda_{\text{ex}} = 365 \text{ nm}$  at room temperature ( $z = 1.0\% - 20.0\%$ ) (a); the distortion index,  $D$ , along with  $z$  for  $[\text{BaO}_8]$  polyhedra and  $[\text{YO}_6]$  octahedra of  $\text{BYSO:Eu}, z\text{Zn}$  (b) samples; PLE and PL spectra of  $\text{BYSO:Eu}, z\text{Zn}$  ( $z = 1.0\% - 20.0\%$ ) samples at room temperature:  $\lambda_{\text{ex}} = 320 \text{ nm}$  &  $\lambda_{\text{em}} = 430 \text{ nm}$  (c),  $\lambda_{\text{ex}} = 340 \text{ nm}$  &  $\lambda_{\text{em}} = 500 \text{ nm}$  (d).

Figure S5 shows the PL spectra of BYSO:Eu,  $z$ Zn samples, which is also reveal series of broad emission bands due to the enhancement of second emission peak when excited at 365 nm. The emission intensities reach the maximum value at  $z = 1.0$  mol % for BYSO:Eu,  $z$ Zn. And for BYSO:Eu,  $z$ Zn, the distortion index for both  $[\text{BaO}_8]$  and  $[\text{YO}_6]$  increase roughly as implied in the Figure S5b, which is responsible for the enhancement of second emission peaks. Under corresponding optimum excitation wavelength, the PL spectra show the similar profiles with higher intensity of peaks at  $\sim 320$  nm than that of peaks at  $\sim 340$  nm (see Figure S5c and d).

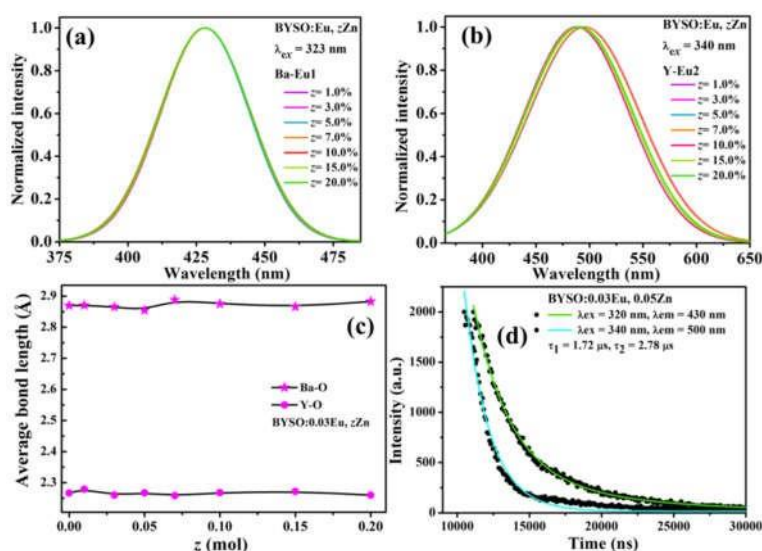

Figure S6. The PL spectra are decomposed into Gaussian contributions from  $\text{Eu}^{2+}$  at the two cation sites in the BYSO:Eu,  $z$ Zn ( $z = 1.0\%$ - $20.0\%$ ),  $\text{Eu}^{2+}$  at the  $\text{Ba}^{2+}$  sites (a),  $\text{Eu}^{2+}$  at the  $\text{Y}^{3+}$  sites (b); the bond length with the various substitution concentrations for Ba-O bond and Y-O bond of BYSO:Eu,  $z$ Zn (c); the corresponding decay curves of the BYSO:0.03 $\text{Eu}^{2+}$ , 0.05 $\text{Zn}^{2+}$  (d).

The Gaussian decomposition results in Figure S6 a and b indicate that there is no peak shifts for  $\text{Eu}(1)^{2+}$  and  $\text{Eu}(2)^{2+}$ , in line with the variation of bond length for Ba-O and Y-O as shown in Figure S6 c. The decay curves of BYSO:0.03 $\text{Eu}^{2+}$ , 0.05 $\text{Zn}^{2+}$  display the characteristic of coexistence of two different kind of  $\text{Eu}^{2+}$  ions with mean decay times of 1.72  $\mu\text{s}$  and 2.78  $\mu\text{s}$  (see Figure S6 d).

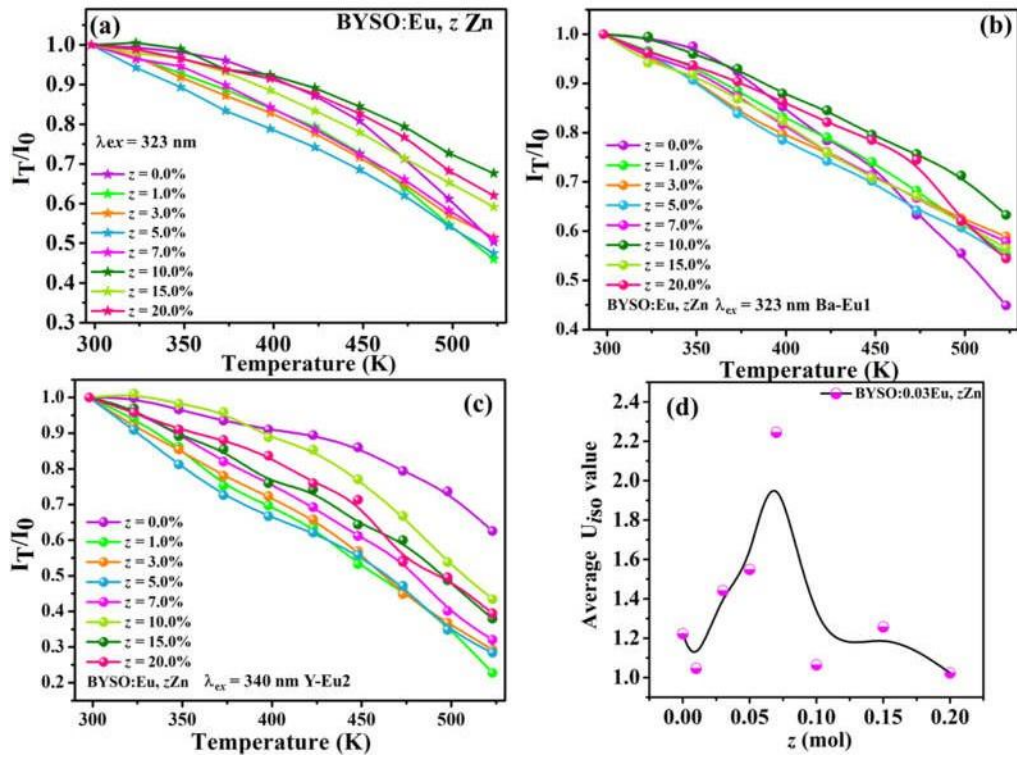

Figure S7. Thermal stability of BYSO:Eu, zZn ( $z = 1.0\%$ - $20.0\%$ ) (a); temperature-dependent PL intensity of Eu(1) in [BaO<sub>8</sub>] polyhedra (under 323 nm) (b) and Eu(2) in [YO<sub>6</sub>] octahedra (under 340 nm) (c) of BYSO:Eu, zZn; concentration-dependence of average  $U_{iso,i}$  values (d).

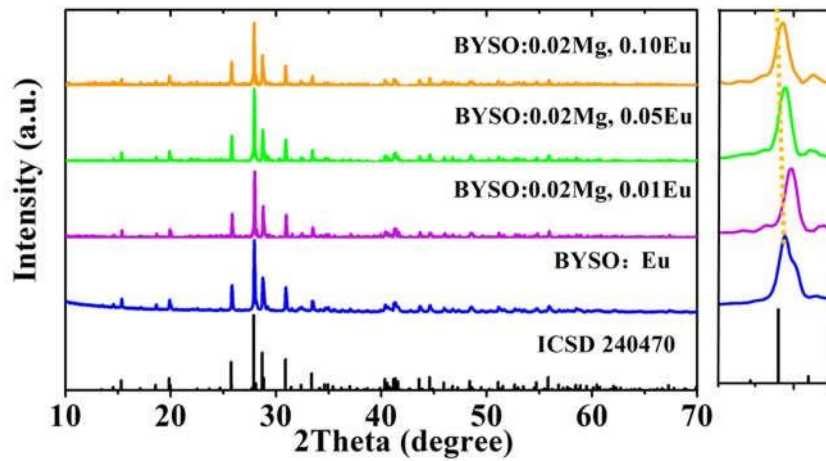

Figure S8. XRD patterns of BMYSO: nEu,  $n = 0.00$ - $0.10$  and the standard reference

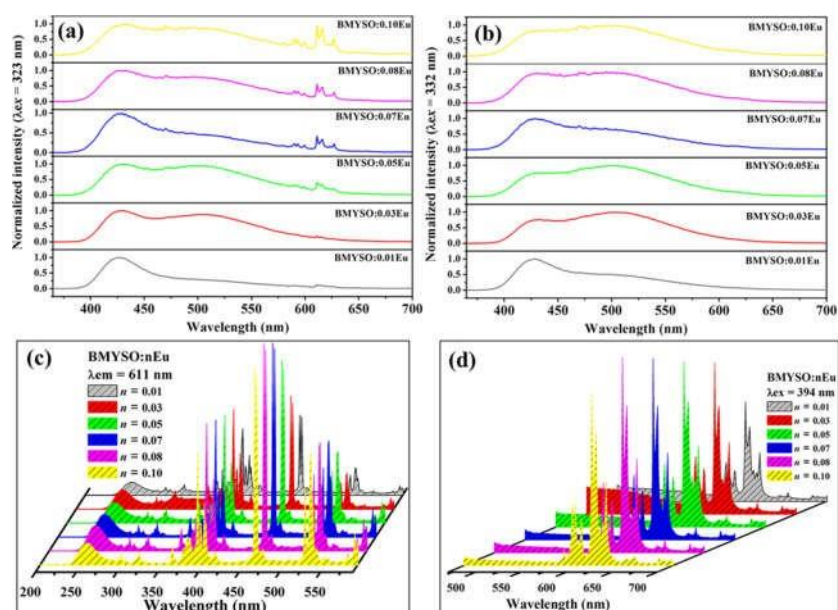

Figure S9. PL spectra of BMYSO:  $n$ Eu ( $n = 0.01$ - $0.10$ ) excited by  $\sim 320$  nm (a),  $\sim 340$  nm (b), 394 nm (d) and PLE spectra monitored at 611 nm (c).

When excited by 320 nm (Figure S9a), the samples exert growing sharp emission in the range from 575 to 625 nm with increased Eu contents. We could also find that the characteristic emission of  $\text{Eu}^{2+}$  maintains the efficient broad bands with variation of  $n$ , similar with the samples doped by 0.03 mol Eu. The PLE (monitored at 611 nm) and PL (excited by 394 nm) spectra of BMYSO:  $n$ Eu samples are shown in Figure S9c and d. It is obvious that both of the PLE and PL intensities reach the maximum values at  $n = 0.08$ .

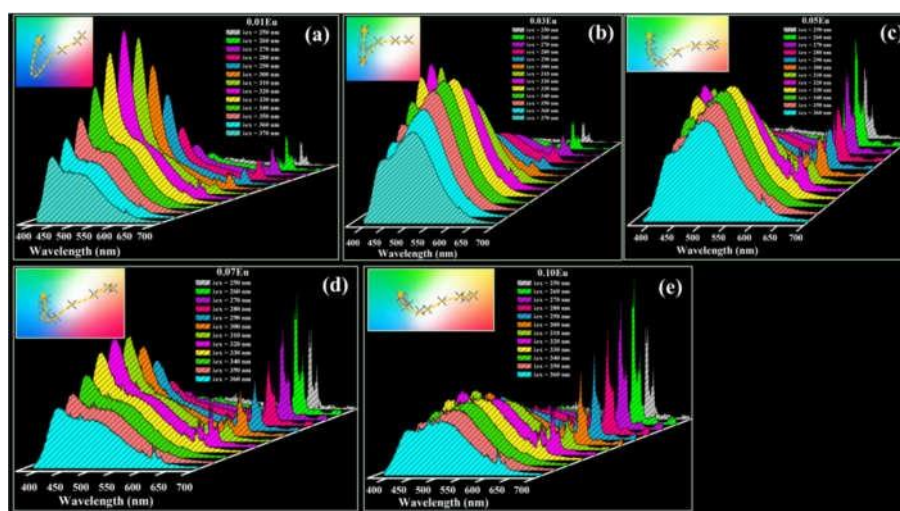

Figure S10. The emission spectra excited by 250 nm~360 nm and the corresponding color coordinates for BMYSO:0.01Eu (a), BMYSO:0.03Eu (b), BMYSO:0.05Eu (c), BMYSO:0.07Eu (d) and BMYSO:0.10Eu (e), respectively.
